# Supplementary material for: Solvothermal in situ synthesis of cyanide-containing ternary silver(I) coordination polymers and their phosphorescent properties
Source: Royal Society of Chemistry journal article supplement (doi:10.1039/c1ce06246h), 2011-12-09

Electronic Supporting Information for:

# Solvothermal In-situ Synthesis of Cyanide-contained Ternary Silver(I) Coordination Polymers and their Phosphorescent Properties

Yun Ling, Fu-Peng Zhai, Ming-Li Deng, Dong Wu, Zhen-Xia Chen, Xiao-Feng Liu,  
Ya-Ming Zhou,\* Lin-Hong Weng

Shanghai Key Laboratory of Molecular Catalysis and Innovative Materials,  
Department of Chemistry, Fudan University, Shanghai (200433), China.

\* To whom corresponding: Dr. Y.M. Zhou, E-mail: [ymzhou@fudan.edu.cn](mailto:ymzhou@fudan.edu.cn);

Fax: +86 21 65643925; Tel: +86 21 65642261

Table S1. Selected bond length (Å) and angles (°) for **1**, **2**, **3**, **4**

| <b>1</b>                  |            |                             |            |
|---------------------------|------------|-----------------------------|------------|
| Ag1–N1                    | 2.226(10)  | Ag1–C5                      | 2.083(13)  |
| Ag1–N5 <sup>i</sup>       | 2.318(12)  | Ag2–N3                      | 2.171(11)  |
| Ag2–N6 <sup>ii</sup>      | 2.166(10)  | Ag3–N2                      | 2.162(12)  |
| Ag3–N4                    | 2.165(12)  | Ag3–N7 <sup>iii</sup>       | 2.630(14)  |
| N7–C5                     | 1.122(19)  |                             |            |
| N1–Ag1–C5                 | 137.7(5)   | N1–Ag1–N5 <sup>i</sup>      | 95.2(4)    |
| N5 <sup>i</sup> –Ag1–C5   | 126.8(5)   | N3–Ag2–N6 <sup>ii</sup>     | 165.9(5)   |
| N2–Ag3–N4                 | 171.0(4)   |                             |            |
| <b>2</b>                  |            |                             |            |
| Ag1–N1                    | 2.127(3)   | Ag2–N2                      | 2.191(3)   |
| Ag2–C7/N4                 | 2.126(4)   | Ag2–N3 <sup>iv</sup>        | 2.261(3)   |
| C7–N4                     | 1.118(7)   |                             |            |
| N1–Ag1–N1 <sup>v</sup>    | 153.27(11) | N2–Ag2–C7/N4                | 128.00(14) |
| N2–Ag2–N3 <sup>iv</sup>   | 115.00(10) | N3 <sup>iv</sup> –Ag2–C7/N4 | 116.67(13) |
| <b>3</b>                  |            |                             |            |
| Ag1–N1                    | 2.075(11)  | Ag1–C18 <sup>vi</sup>       | 2.026(14)  |
| Ag2–N2                    | 2.201(11)  | Ag2–N4                      | 2.182(10)  |
| Ag2–N7                    | 2.118(11)  | Ag3–N3                      | 2.231(10)  |
| Ag3–N5                    | 2.234(11)  | Ag3–N8                      | 2.173(12)  |
| Ag4–N6                    | 2.082(10)  | Ag4–C17 <sup>vii</sup>      | 2.057(13)  |
| N7–C17                    | 1.143(17)  | N8–C18                      | 1.149(18)  |
| N1–Ag1–C18 <sup>vi</sup>  | 174.8(5)   | N2–Ag2–N4                   | 117.4(4)   |
| N2–Ag2–N7                 | 119.9(4)   | N4–Ag2–N7                   | 122.1(4)   |
| N3–Ag3–N5                 | 117.4(4)   | N3–Ag3–N8                   | 121.3(4)   |
| N5–Ag3–N8                 | 116.9(4)   | N6–Ag4–C17 <sup>vii</sup>   | 174.4(5)   |
| <b>4</b>                  |            |                             |            |
| Ag1–N2                    | 2.074(10)  | Ag1–N4                      | 2.083(8)   |
| Ag2–N5                    | 2.350(8)   | Ag2–C18/N8                  | 2.085(11)  |
| Ag2–N6 <sup>viii</sup>    | 2.165(8)   | Ag3–N1                      | 2.220(10)  |
| Ag3–C17/N7                | 2.066(16)  | Ag3–N3 <sup>ix</sup>        | 2.225(10)  |
| C17–N7                    | 1.14(2)    | C18–N8                      | 1.15(2)    |
| N2–Ag1–N4                 | 178.0(3)   | N5–Ag2–C18                  | 111.2(4)   |
| N5–Ag2–N6 <sup>viii</sup> | 105.0(3)   | N6 <sup>viii</sup> –Ag2–C18 | 143.8(4)   |
| N1–Ag3–C17                | 128.1(5)   | N1–Ag3–N3 <sup>ix</sup>     | 105.3(4)   |
| N3 <sup>ix</sup> –Ag3–C17 | 126.6(5)   |                             |            |

Symmetry code used: i: -x, 1-y, 2-z; ii: 1+x, 1+y, -1+z; iii: -1+x, 1+y, z; iv: 1/2-x, 1/2-y, 1-z; v: -x, y, 3/2-z; vi: 2-x, -1/2+y, 1/2-z; vii: 1-x, 1/2+y, 3/2-z; viii: 1/2-x, -1/2+y, z; ix: 1/2-x, 1/2+y, z

Fig. S1. the PXRD patterns for **1** (a), **2** (b), **3** (c), **4** (d) compared with its simulated one (I: the simulated data from CIF, II: the solvothermal in-situ product, III: the product obtained using AgCN as the source. )

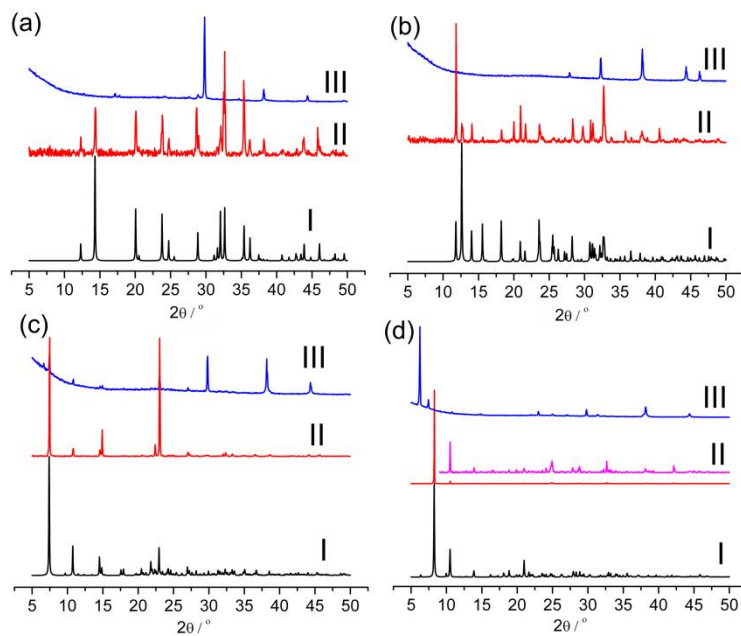

Fig. S2. the IR spectra of **1**, **2**, **3**, **4** and  $[\text{Ag}_3(\text{dmtrz})_2\text{CN}]_n$  showing characteristic absorption bands of CN- group

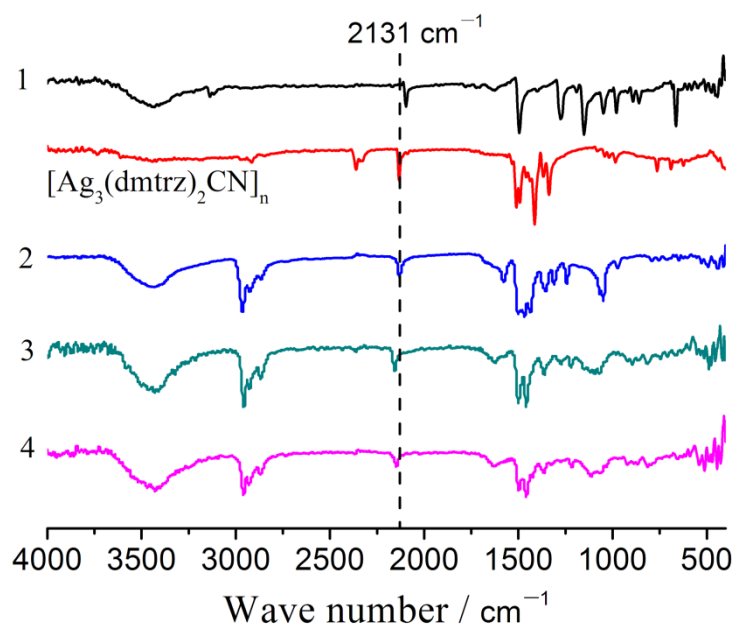

Fig. S3. the TGA data of **1(a)**, **2(b)**, **3(c)**, **4(d)** and  $[\text{Ag}_3(\text{dmtrz})_2(\text{CN})]_n$ .

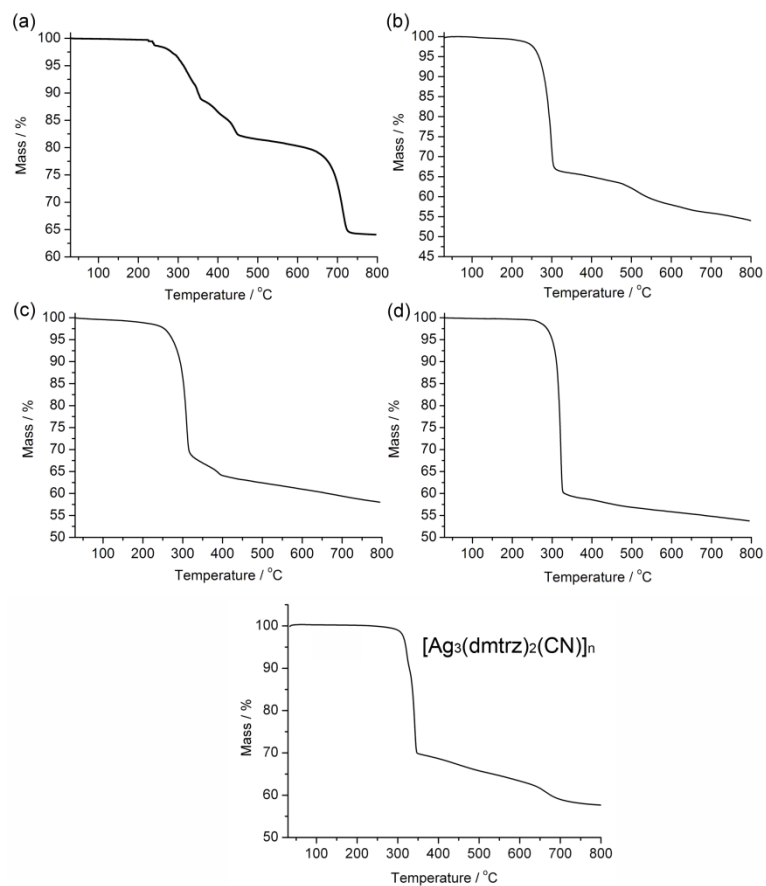

Fig. S4. (a) the 2D layer structure of **1** generated by connecting neighboring 1D chain structures through Ag(3)⋯N(7) interactions (*ca.* distance 2.603 Å); (b) 3D packing structure generated by connecting neighboring 2D layers through argentophilic interactions

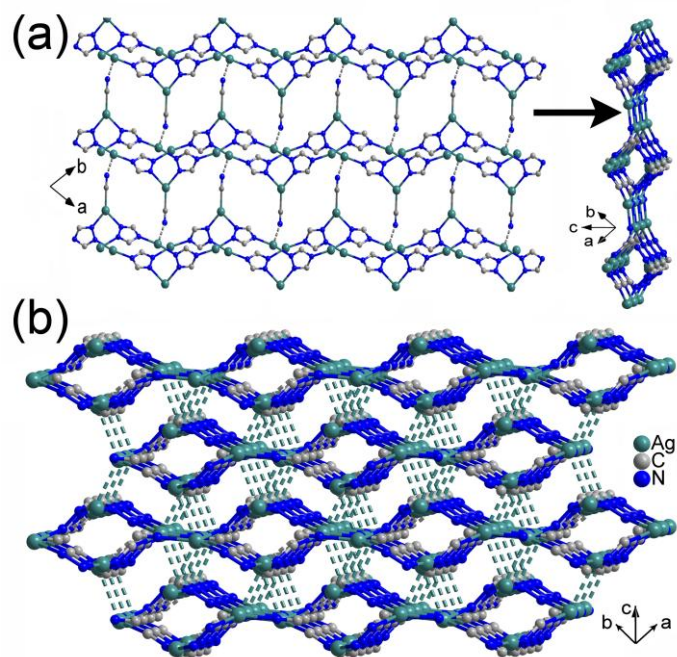

Fig. S5. the phosphorescent property of **1** (dot-line: excitation spectra; red solid-line: emission spectra at room temperature, blue solid-line: emission spectra at 77K)

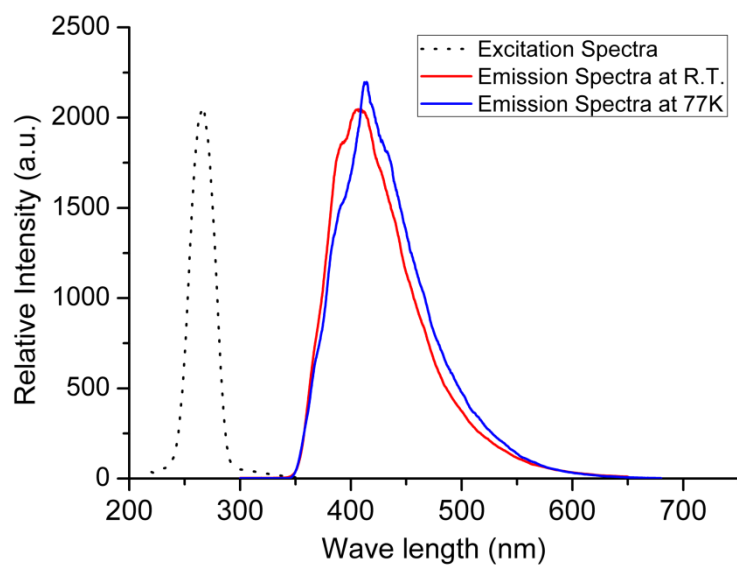

Fig. S6. the phosphorescent property of **2** (dot-line: excitation spectra; red solid-line: emission spectra at room temperature, blue solid-line: emission spectra at 77K)

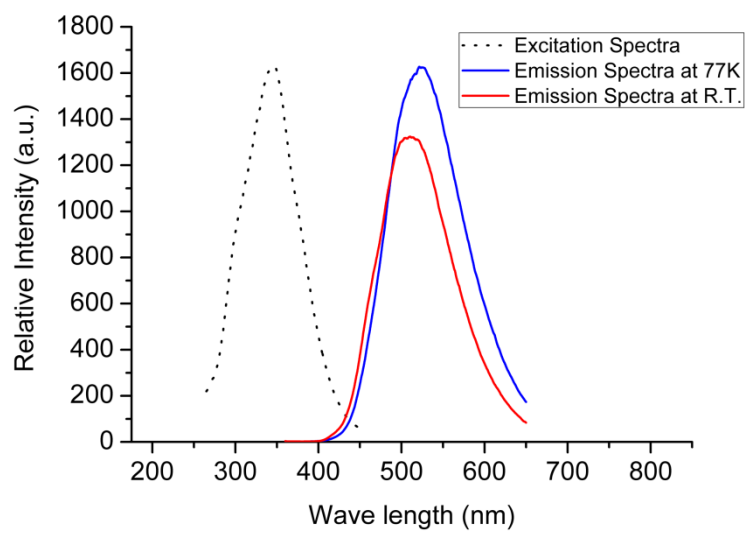



Fig. S7. the phosphorescent property of **3** (red solid-line: emission spectra at room temperature, blue solid-line: emission spectra at 77K, excited by 340 nm)

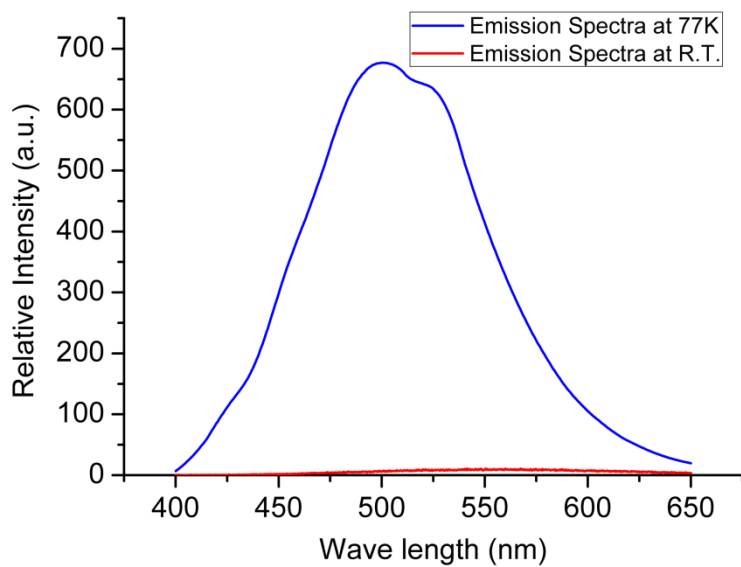

Fig. S8. the phosphorescent property of **4** (red solid-line: emission spectra at room temperature, blue solid-line: emission spectra at 77K, excited by 340 nm)

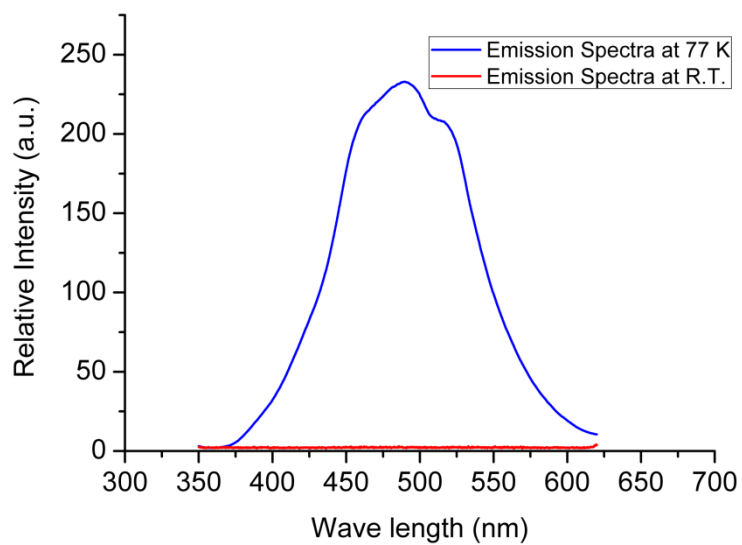

Fig. S9. Energy band structures and density of states (total and partial) of **1** (a and c) and  $[\text{Ag}(\text{trz})]_n$  (b and d) (theoretical calculation of the electronic band structure of **1** and  $[\text{Ag}(\text{trz})]_n$  along with density of states has been carried out with the DMol<sup>3</sup> code. the Fermi level is set at 0 Ha. The calculated energy gaps for **1** and  $[\text{Ag}(\text{trz})]_n$  are 0.151 and 0.149 Ha, respectively, which are very close. 1Ha = 27.2114 eV)

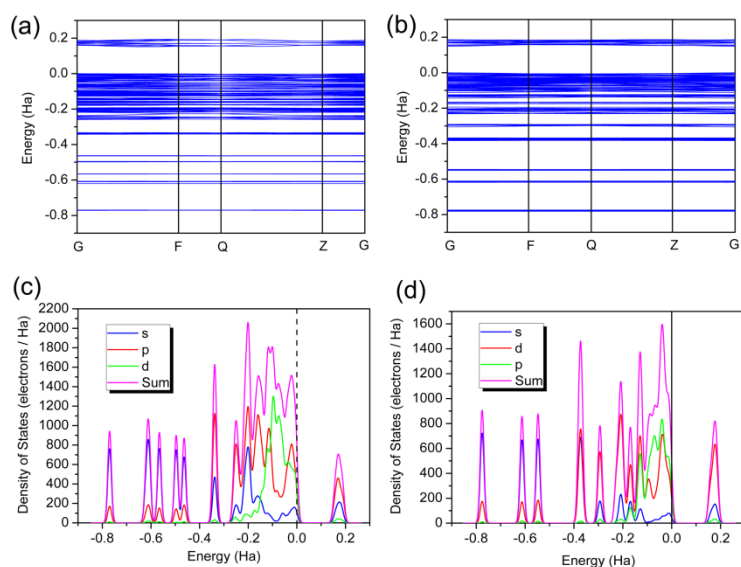

Supplement: c1ce06246h.pdf [file c1ce06246h.pdf]
